# Supplementary material for: Efficient generation of conditional knockout mice via sequential introduction of lox sites
Source: PubMed Central journal article supplement (PMC5554182; doi:10.1038/s41598-017-08496-8), 2017-08-11
Supplement: 41598_2017_8496_MOESM1_ESM.pdf [file 41598_2017_8496_MOESM1_ESM.pdf]

# Supplementary Information

**Title:**

Efficient generation of conditional knockout mice via sequential introduction of lox sites

**Authors:**

Takuro Horii, Sumiyo Morita, Mika Kimura, Naomi Terawaki, Mihiro Shibutani and Izuho Hatada

**Table of Contents****Supplementary Figures**

Figure S1. Integration of lox66 and lox71 sites at the *Mecp2* locus.

Figure S2. Generation of *Mecp2-flox* blastocyst embryos by simultaneous and sequential methods.

Figure S3. Integration of loxP sites on the *Tet3* locus.

Figure S4. DNA sequences from tail tips of *Mecp2-flox* founder mice.

Figure S5. DNA sequences from tail tips of *Tet3-flox* founder mice.

Figure S6. Generation of Cre/lox mice by mating of a *Mecp2-flox* mouse with an *Adipoq-Cre* mouse.

Figure S7. Off-target analysis in *Mecp2-flox* founders.

Figure S8. Off-target analysis in *Tet3-flox* founders.

Figure S9. PCR and RFLP assays for Cre/lox founder mice (full-length gels related to Fig. 2b).

**Supplementary Tables**

Table S1. Generation of *Mecp2* flox blastocyst embryos.

Table S2. Generation of *Tet3* flox blastocyst embryos by electroporation.

Table S3. Generation of *Mecp2* flox mice.

Table S4. Generation of *Tet3* flox mice by electroporation.

Table S5. Direct production of Cre/lox mice by sequential electroporation.

Table S6. gRNA and oligonucleotides used in this study.

Table S7. Oligonucleotides used for off-target analysis used in this study.

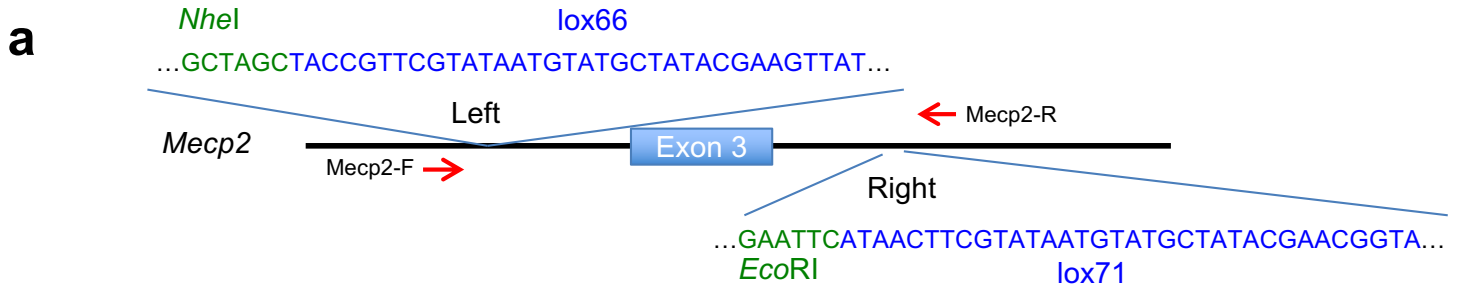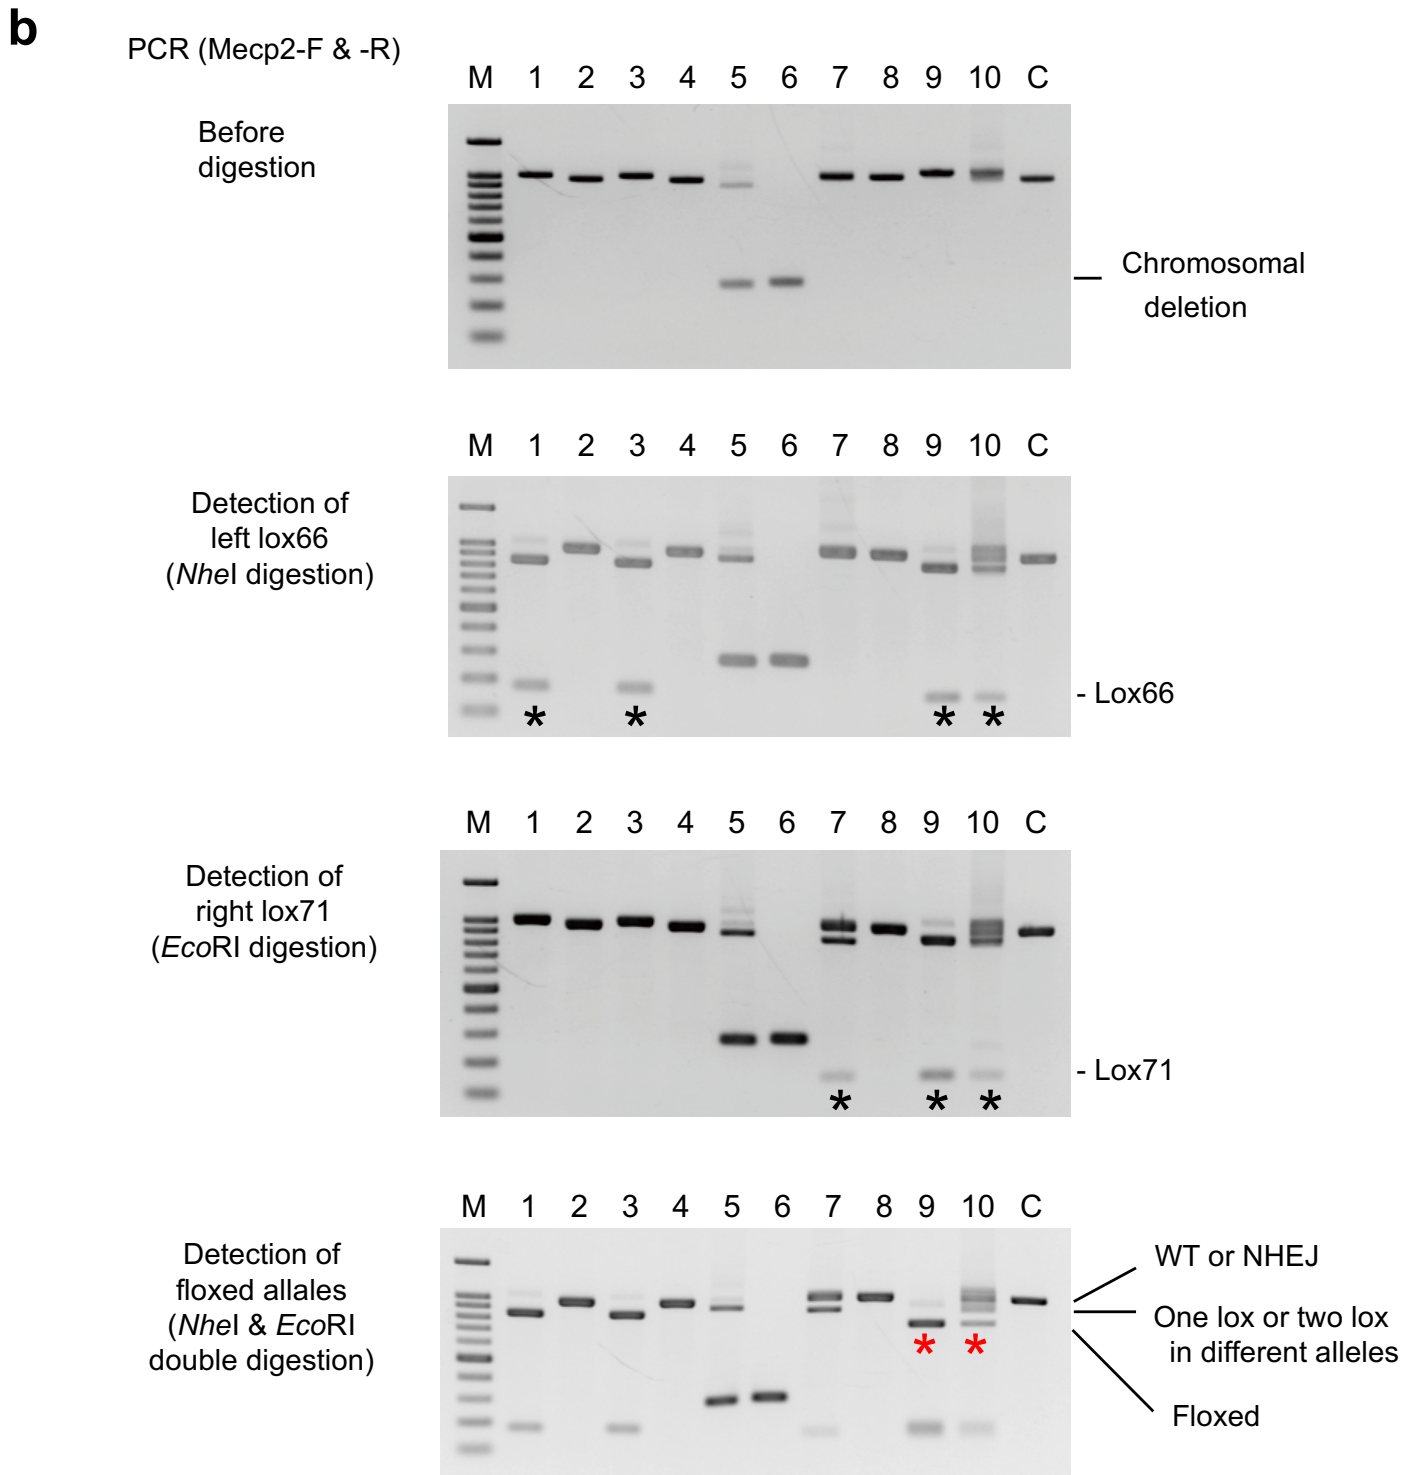

**Figure S1** (legend continued on next page)

Integration of lox66 and lox71 sites at the *Mecp2* locus. **(a)** Schematic of the Cas9/gRNA/ssODN targeting sites. In ssODN donor sequence, the lox66 and lox71 sites is labeled in blue, and the restriction site sequence is in green. PCR primers used for RFLP analysis of right and left lox sites are shown as red arrows. **(b)** Representative PCR and RFLP analysis of lox mice generated by sequential electroporation. In the samples before digestion, samples No.5 and 6 contain chromosomal deletions. If lox site including restriction site shift down after digestion, lox is inserted into the intron (black stars). The samples containing floxed alleles are indicated by a red star. Part of samples containing floxed alleles were finally confirmed by the sequencing analysis (see **Fig. S4**). C, wild type control, M, DNA molecular marker (100 bp ladder).

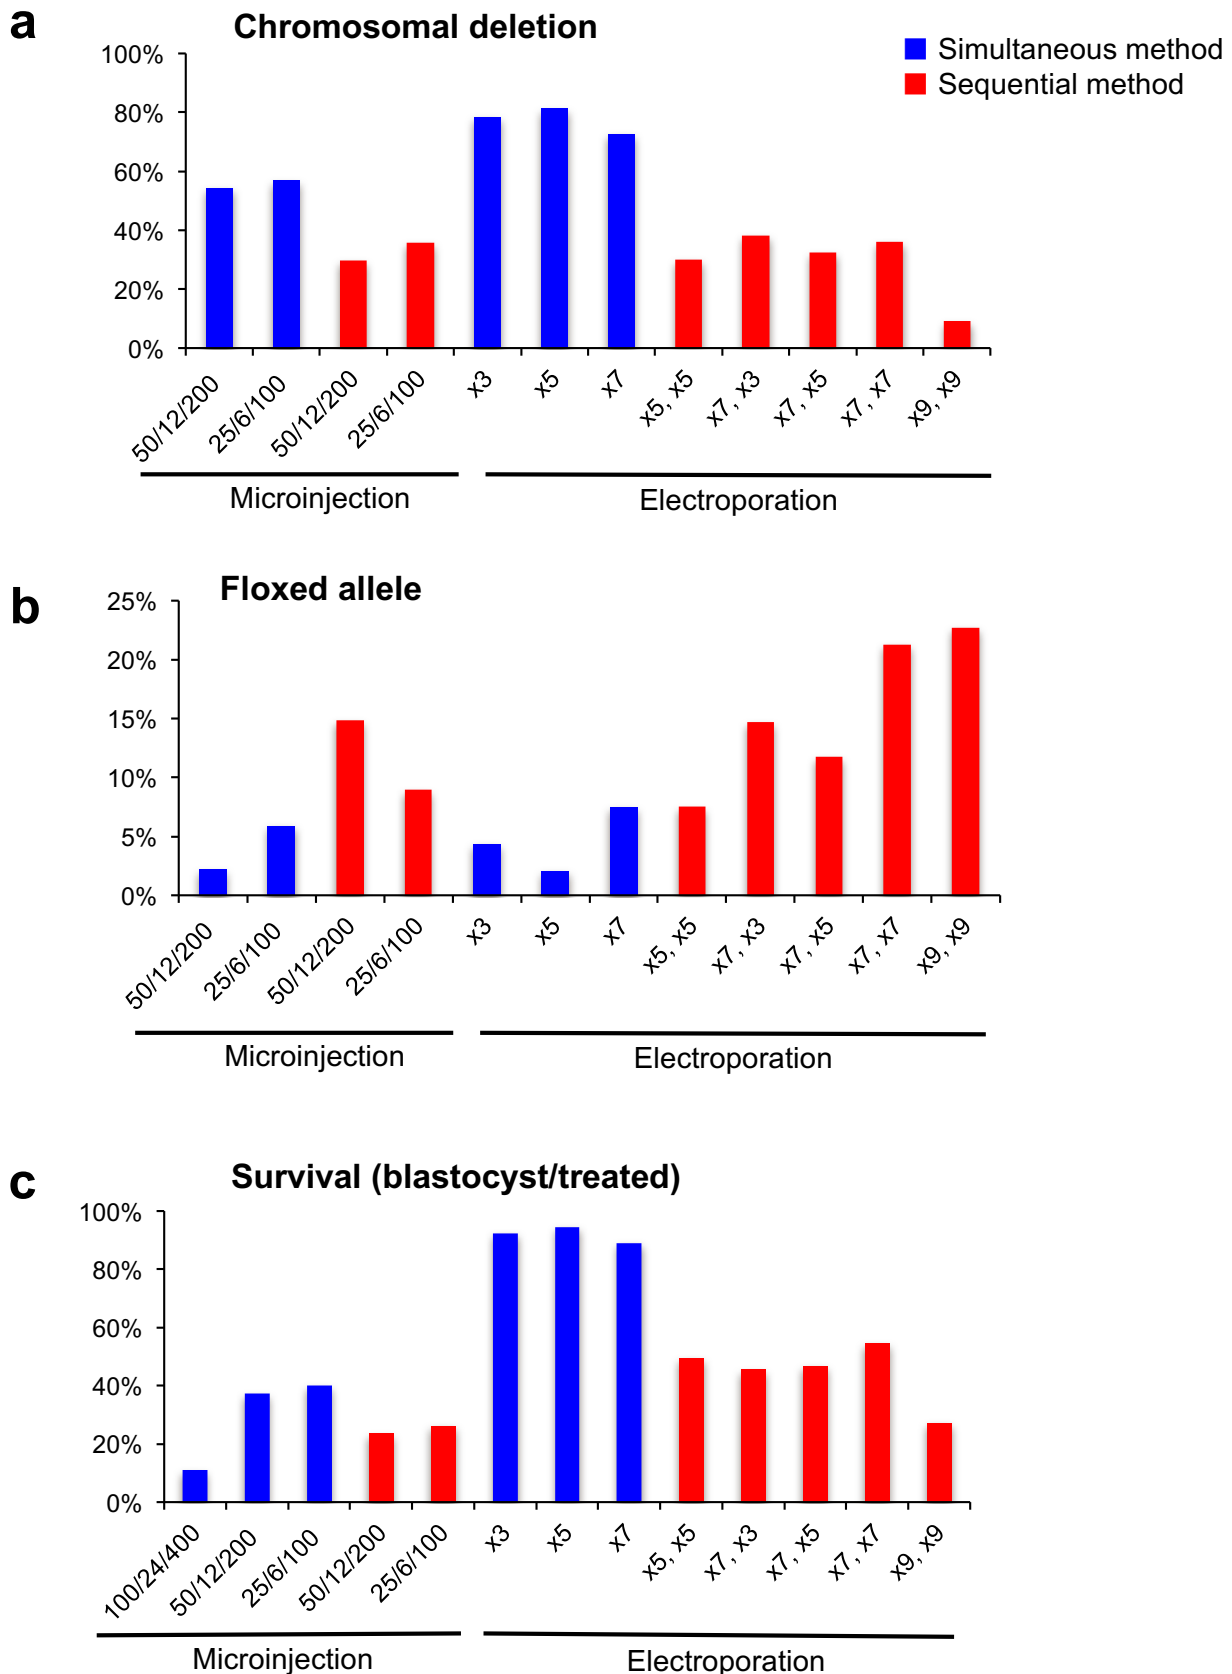

**Figure S2**

Generation of *Mecp2-flox* blastocyst embryos by simultaneous and sequential methods.

The percentages of (a) chromosomal deletion, (b) floxed allele and (c) survival (blastocyst/treated) in the examined blastocysts. As a whole, percentages of floxed allele was increased by decrease of chromosomal deletion in the sequential method. On the other hand, percentages of survival was decreased in sequential methods due to additional manipulation. Labels of X-axis in microinjection show concentration of Cas9/gRNA/ssODN (ng/ $\mu$ l). Labels of x-axis in electroporation show numbers of electric pulse. The results are also shown in **Table S1**.

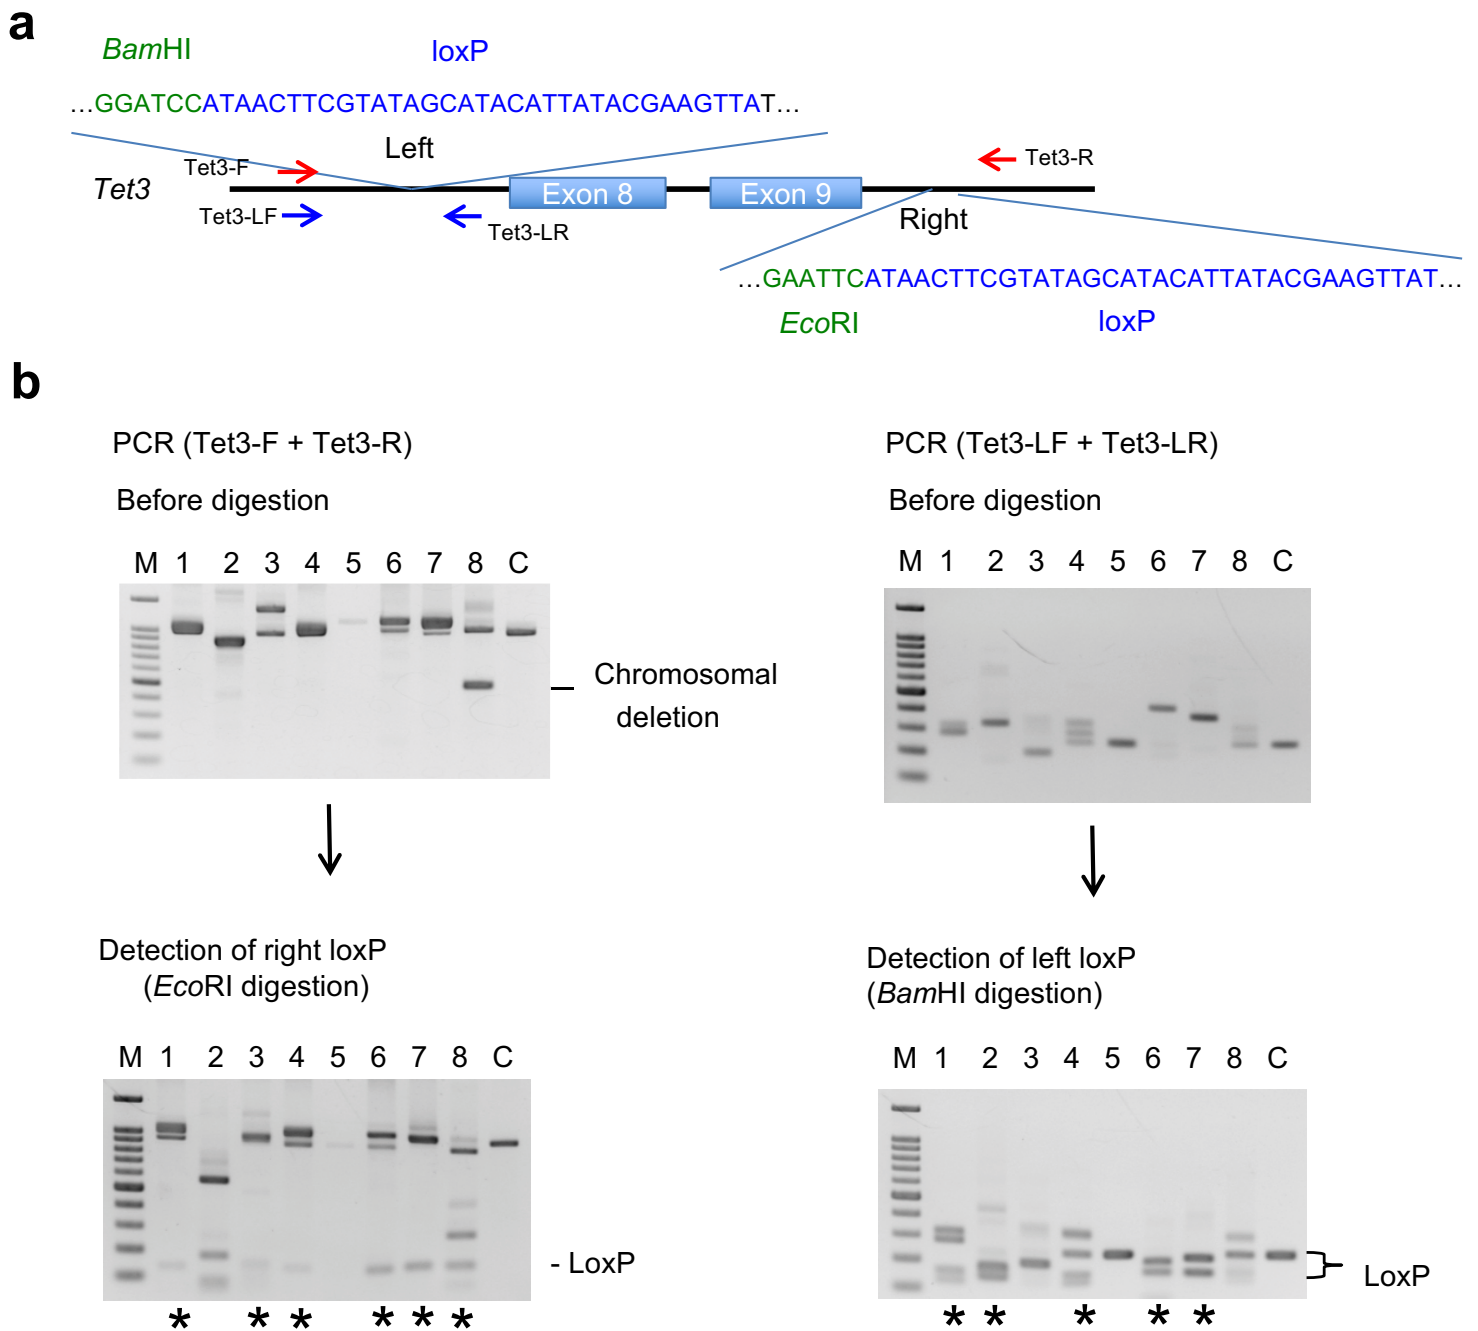

### Figure S3

Integration of loxP sites on the *Tet3* locus.

(a) Schematic of the Cas9/gRNA/ssODN targeting sites. In ssODN donor sequence, the loxP site is labeled in blue, and the restriction site sequence is in green. PCR primers used for RFLP analysis of right and left loxP sites are shown as red and blue arrows, respectively. (b) Representative PCR-RFLP analysis of loxP mice generated by sequential electroporation. In the samples before digestion, a sample No.8 contained chromosomal deletion. If loxP site including restriction site shift down after digestion, loxP is inserted to the site (\*). Floxed allele was finally confirmed by the sequencing analysis, and sample No.1, 4, 6, 7 contained floxed alleles (see Fig. S5). C, wild type control, M, DNA molecular marker (100 bp ladder).

Sample ID

**Mecp2-9**  
♂

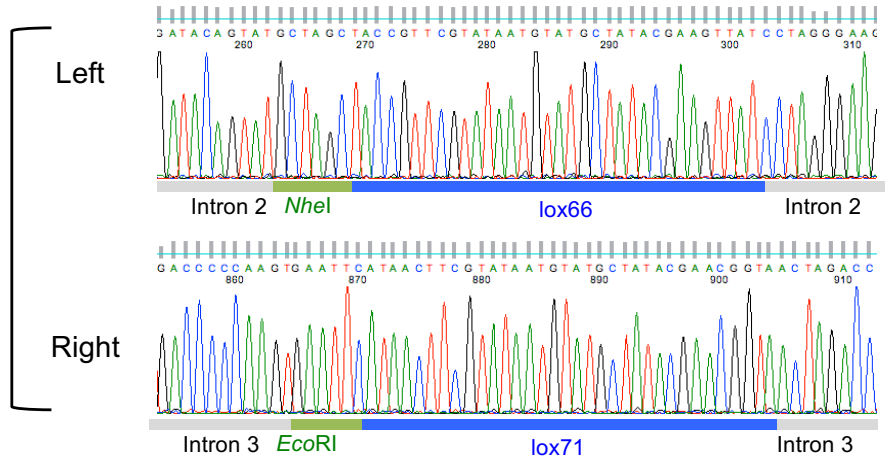

**Mecp2-10**  
♀

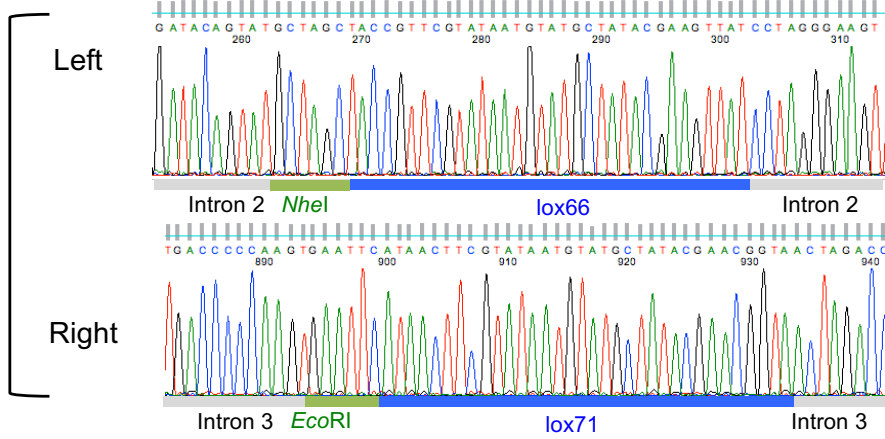

**Mecp2-21**  
♂

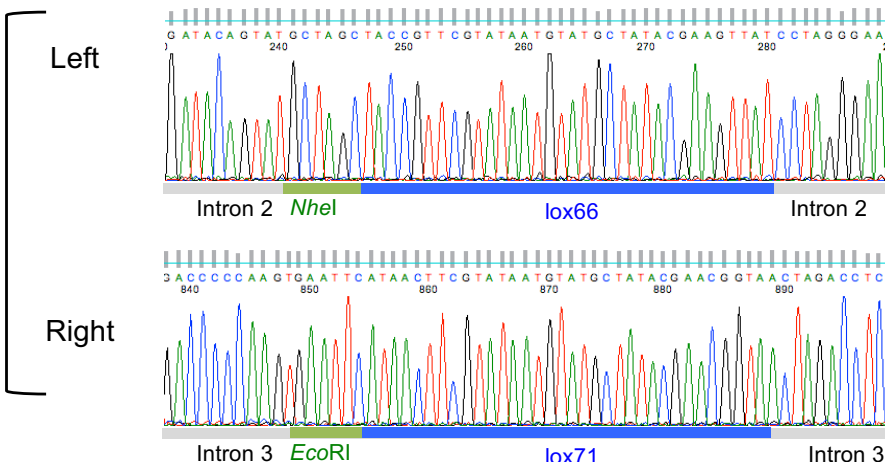

**Mecp2-33**  
♀

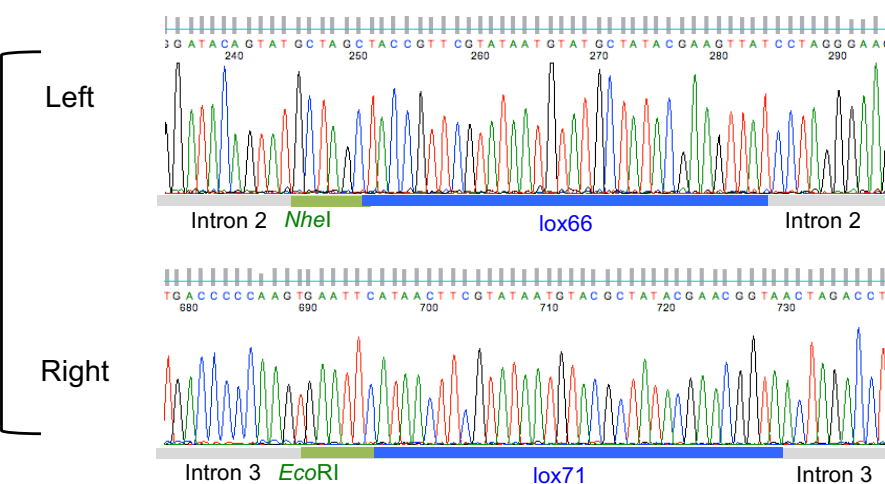

Figure S4 (legend continued on next page)

DNA sequences from tail tips of *Mecp2-flox* founder mice. The sequences in blue indicate the lox sequences (lox66 and lox77) and the green sequences represent the sites of restriction enzyme (*NheI* and *EcoRI*). All samples contained precise lox66 or lox71 insertions.

Sample ID

Tet3-1  
♂

Left

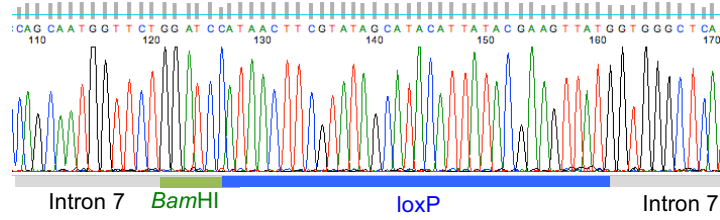

Right

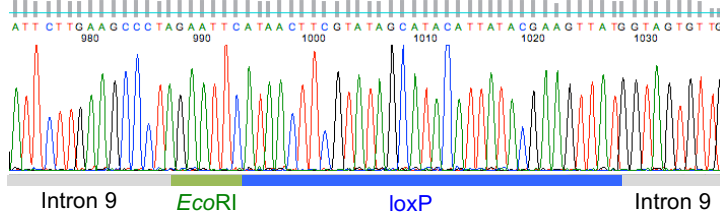

Tet3-4  
♀

Left

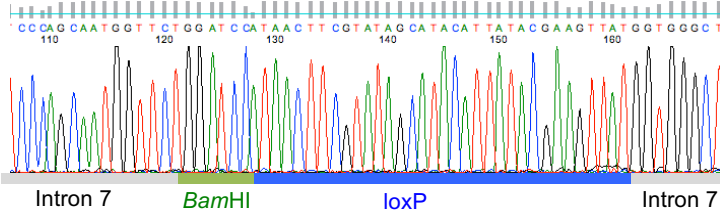

Right

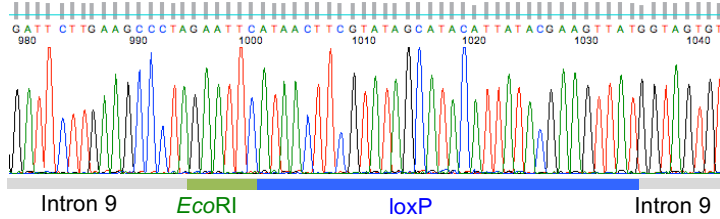

Tet3-6  
♀

Left

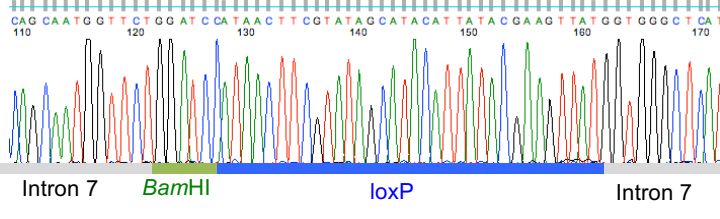

Right

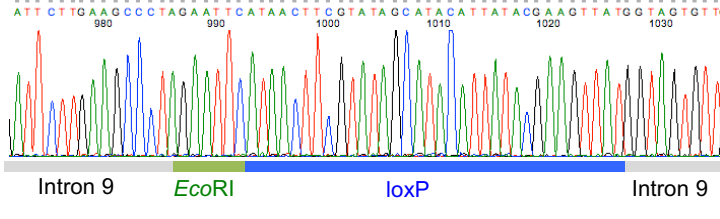

Tet3-7  
♀

Left

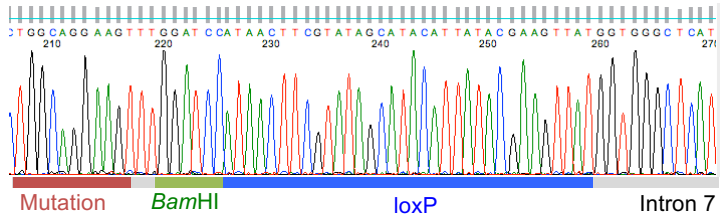

Right

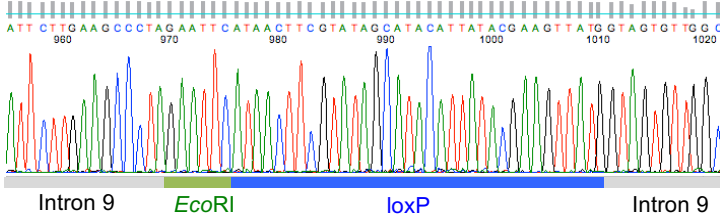

Figure S5 (legend continued on next page)



DNA sequences from tail tips of *Tet3-flox* founder mice.

The sequences in blue indicate the loxP sequences and the green sequences represent the sites of restriction enzyme (*Bam*HI and *Eco*RI). All samples contained precise loxP insertion, but Tet3-7 had mutation in the intron 7 (shown in red).

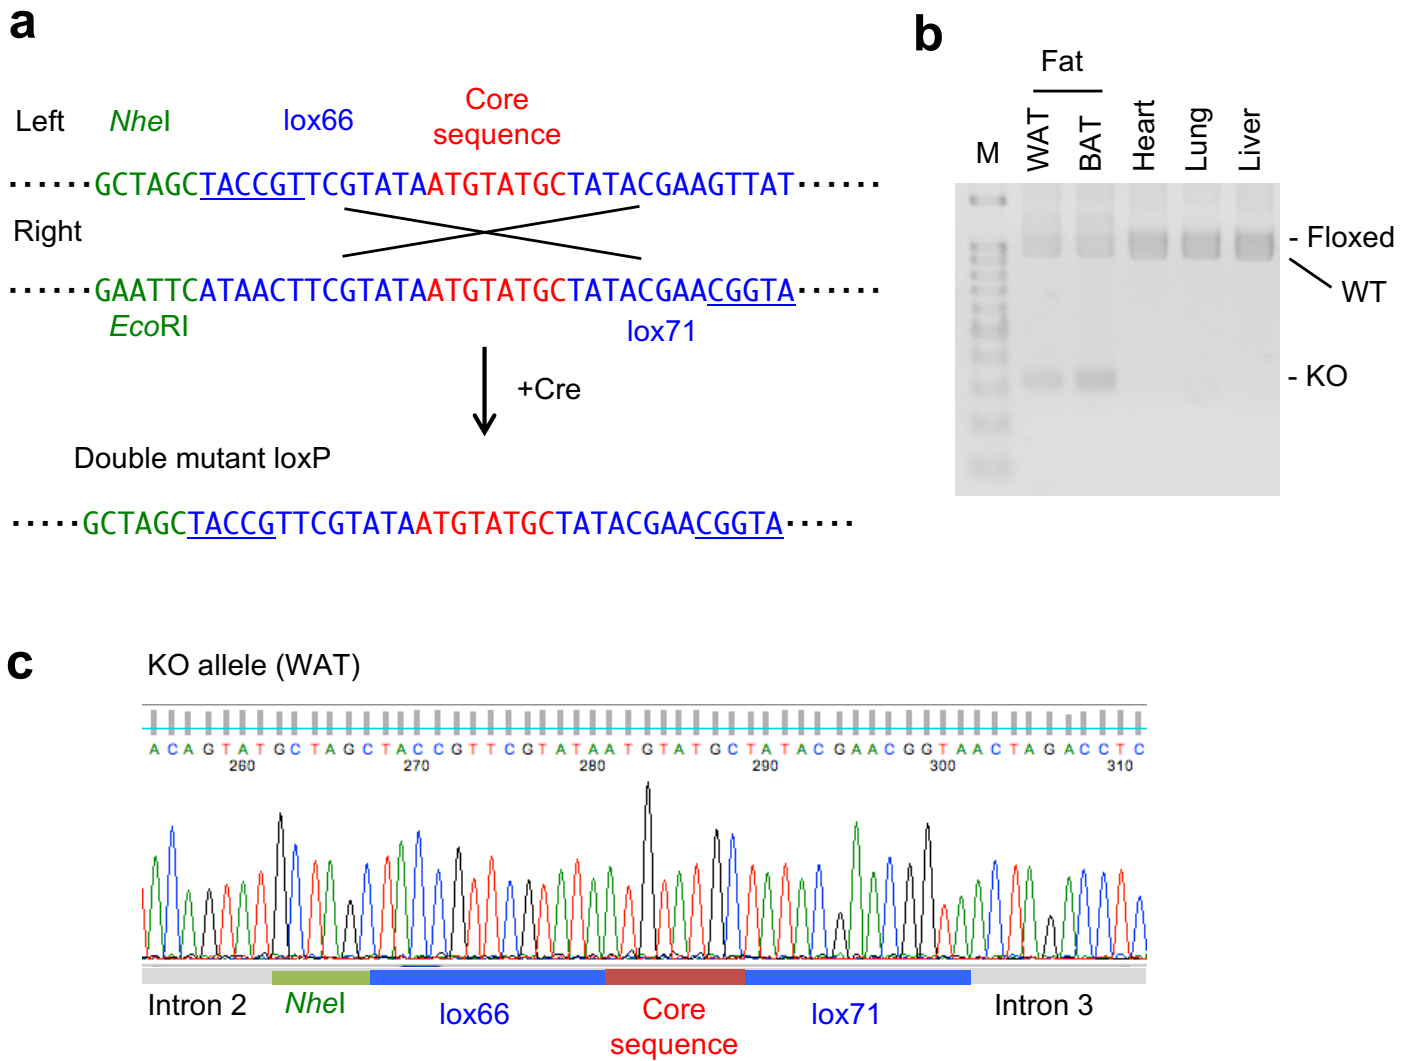

### Figure S6

Generation of Cre/lox mice by mating of a *Mecp2-flox* mouse with an *Adipoq-Cre* mouse.

(a) Schematic representation of Cre/lox system mediated by mutated variants of loxP. Nucleotide sequences of mutated loxPs (lox66 and lox71) are listed in blue (mutated sequences are underlined). Red characters indicate non-palindromic core sequence. Cre-mediated recombination between lox66 and lox71 sites generates a double mutant loxP site and a circular wild type loxP site (not shown). (b) PCR analysis of several tissues derived from *Adipoq<sup>cre/wt</sup>, Mecp2<sup>flox/wt</sup>* female mice, showing fat specific KO. WAT, white adipose tissue; BAT, brown adipose tissue. M, DNA molecular marker (100 bp ladder). (c) Sequencing analysis for a KO allele in WAT, showing the complete deletion of exon 3 region by recombination.

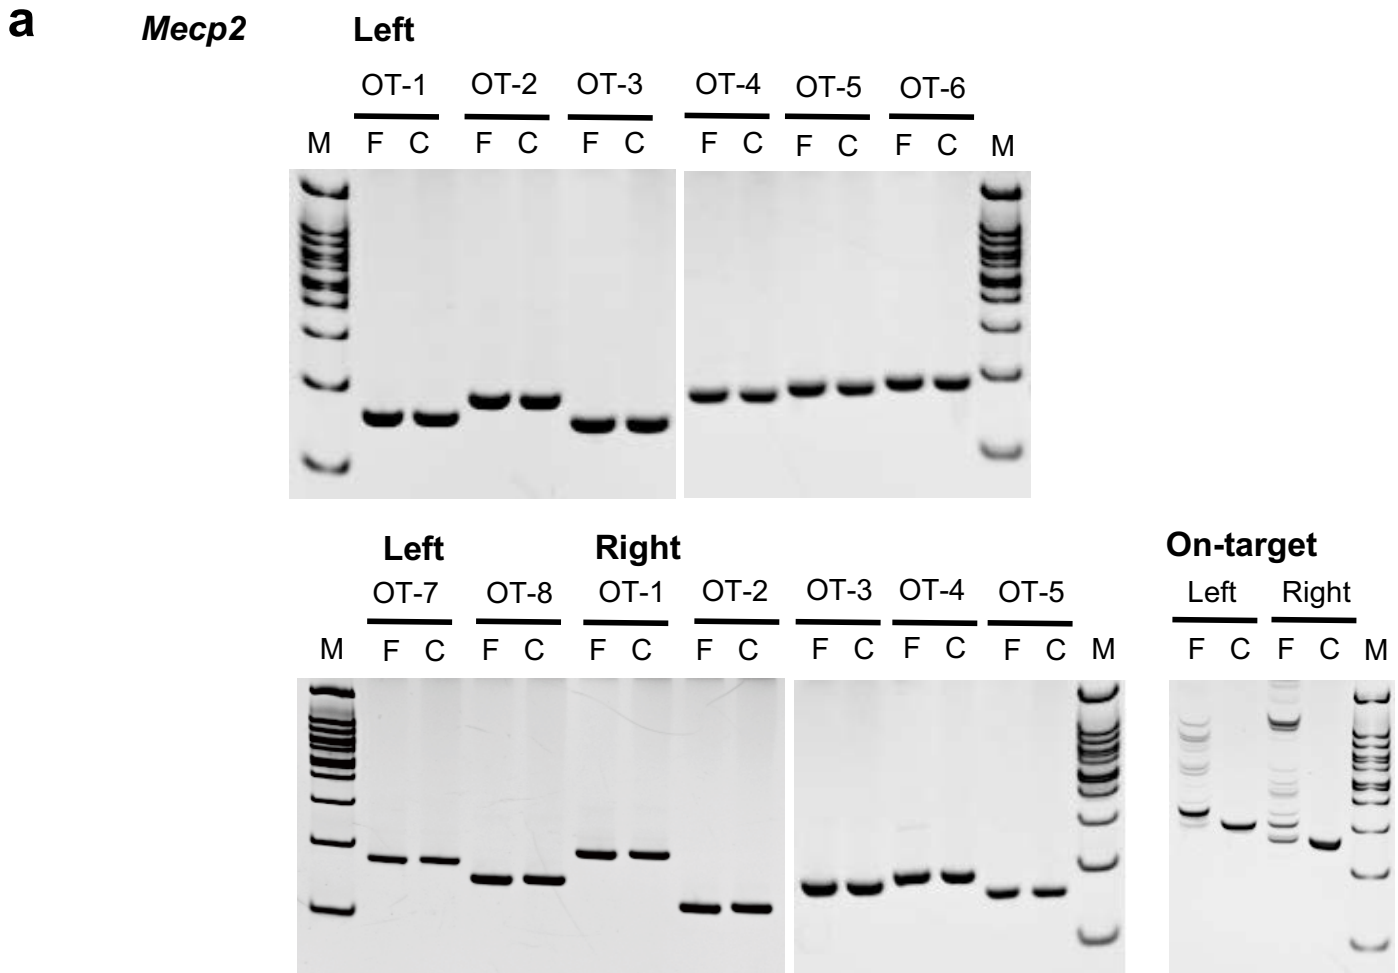

**b** *Mecp2*

← 20 mer →

← 12 mer → PAM

CCCAAGGATACAGTATCCTAAGG

|              | On-target                                                                                | Frequency   |
|--------------|------------------------------------------------------------------------------------------|-------------|
| <b>Left</b>  |                                                                                          |             |
| OT-7         | TTTTGGGCGATTATACAGTATCCTA <u>AGG</u> TCAA<br>TTTTGGGCGATTATACAGTATCCTA <u>AGG</u> TCAA   | WT<br>16/16 |
| OT-8         | CTAACATCTTTTATACAGTATCCTA <u>AGG</u> TCTCT<br>CTAACATCTTTTATACAGTATCCTA <u>AGG</u> TCTCT | WT<br>16/16 |
| <b>Right</b> |                                                                                          |             |
| On-target    | AGGAGTGAGGTCTAGTACTT <u>GGG</u>                                                          |             |
| OT-1         | AGGCAGGGGGTATGGTCTAGTACTT <u>GGG</u> GGTTG<br>AGGCAGGGGGTATGGTCTAGTACTT <u>GGG</u> GGTTG | WT<br>16/16 |
| OT-2         | CCAGAAGGGGCGTGGTCTAGTACTT <u>GGG</u> GGCG<br>CCAGAAGGGGCGTGGTCTAGTACTT <u>GGG</u> GGCG   | WT<br>16/16 |

**Figure S7**

Off-target analysis in *Mecp2-flox* founders.

Eight off-target (OT) sites of *Mecp2*-Left gRNA and five OT sites of *Mecp2*-Right gRNA were assayed in the pooled genomic DNA sample derived from nine *flox* founder mice generated by sequential electroporation. (a) Heteroduplex mobility assay (HMA) for detecting off-target alterations. F, floxed founder mice; C, wild type control mice. M, DNA molecular marker (100 bp ladder). (b) Sequencing analysis for four off-target sites of two *Mecp2* gRNAs. Target 20 mer sequences are labeled in red, and PAM sequences are underlined. Base substitutions are labeled in blue. These assays did not detect off-target alterations.

**Tet3**  
**Left**

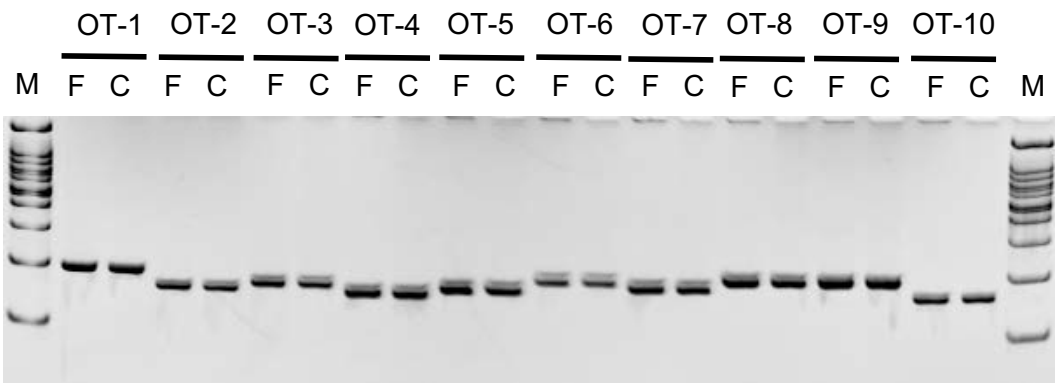

**Right**

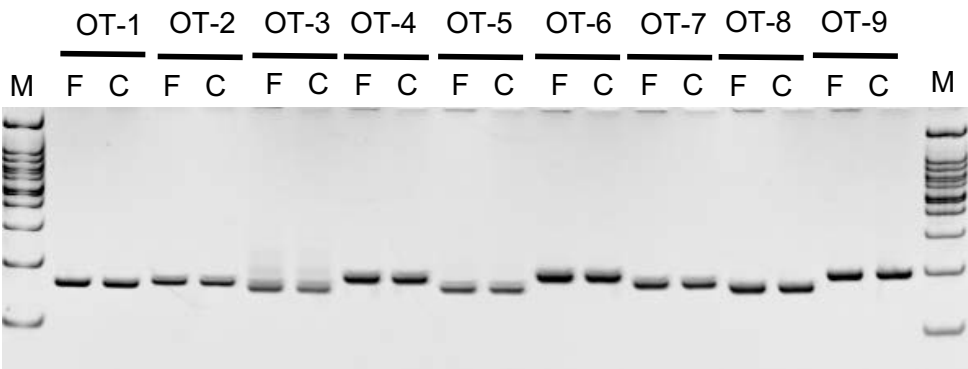

**On-target**

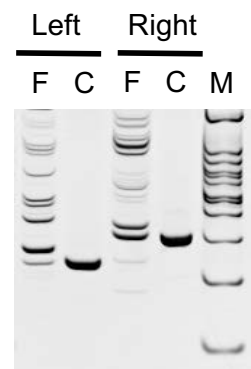

**Figure S8**

Off-target analysis in *Tet3-flox* founders.

Ten off-target (OT) sites of *Tet3-Left* gRNA and nine OT sites of *Tet3-Right* gRNA were assayed in the pooled genomic DNA sample derived from four *Tet3-flox* founder mice generated by sequential electroporation. Heteroduplex mobility assay (HMA) for detecting off-target alterations did not detect off-target alterations. F, floxed founder mice; C, wild type control mice. M, DNA molecular marker (100 bp ladder).

## Cre (Adipoq-Cre)

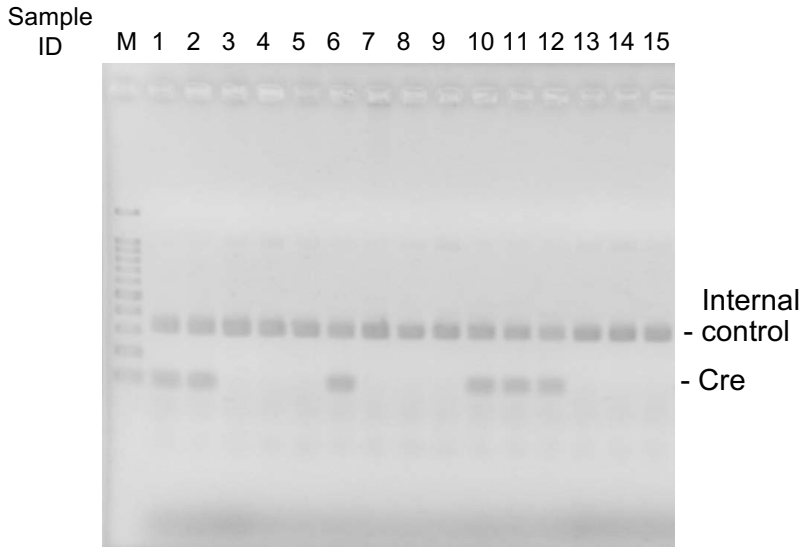

## Lox in *Mecp2* locus (*NheI* & *EcoRI* digestion)

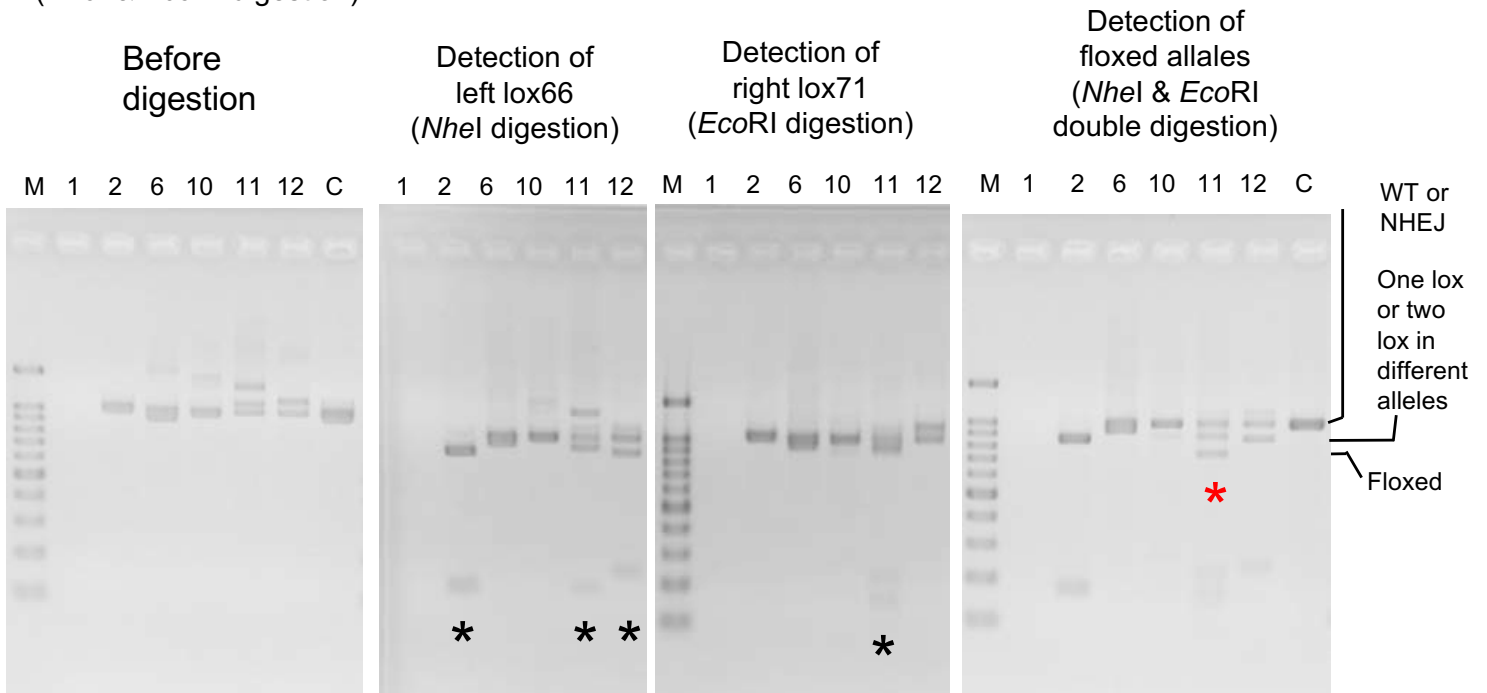

### Figure S9

PCR and RFLP assays for Cre/lox founder mice (full-length gels related to **Fig. 2b**).

Lox66 and lox71 were inserted into the *Mecp2* locus by sequential electroporation using *Adipoq-Cre* zygotes. The samples containing the Cre transgene are indicated in red. If lox site including restriction site shift down after digestion, lox is inserted into the intron (black stars). The samples containing floxed alleles are indicated by a red star. Genomic DNA from sample No. 1 was not amplified by lox PCR. In this experiment, one out of five (20%) Cre transgenic mice had a floxed allele. C, wild type control; M, DNA molecular marker (100 bp ladder).

**Table S1.** Generation of *Mecp2* flox blastocyst embryos.

| Micro-injection         | Cas9/gRNA/ssODN (ng/μl)          | Blastocyst /Treated Zygotes (%) <sup>a</sup> | Left lox66 /Blastocyst <sup>b</sup> (%) | Right lox71 /Blastocyst <sup>b</sup> (%) | 2 lox /Blastocyst <sup>b</sup> (%) | Flox /Blastocyst <sup>b</sup> (%) | Deletion /Blastocyst <sup>b</sup> (%) |
|-------------------------|----------------------------------|----------------------------------------------|-----------------------------------------|------------------------------------------|------------------------------------|-----------------------------------|---------------------------------------|
| Simultaneous            | 100/24/400                       | <b>9/82 (11%)</b>                            | N.D.                                    | N.D.                                     | N.D.                               | <b>N.D.</b>                       | <b>N.D.</b>                           |
|                         | 50/12/200                        | <b>47/126 (37%)</b>                          | 9/46 (20%)                              | 8/46 (17%)                               | 2/46 (4%)                          | <b>1/46 (2%)</b>                  | <b>25/46 (54%)</b>                    |
|                         | 25/6/100                         | <b>117/292 (40%)</b>                         | 12/102 (12%)                            | 18/102 (18%)                             | 9/102 (9%)                         | <b>6/102 (6%)</b>                 | <b>58/102 (57%)</b>                   |
| Sequential <sup>c</sup> | 50/12/200                        | <b>27/115 (23%)</b>                          | 9/27 (33%)                              | 8/27 (30%)                               | 5/27 (19%)                         | <b>4/27 (15%)</b>                 | <b>8/27 (30%)</b>                     |
|                         | 25/6/100                         | <b>68/261 (26%)</b>                          | 21/6 (31%)                              | 29/67 (43%)                              | 9/67 (13%)                         | <b>6/67 (9%)</b>                  | <b>24/67 (36%)</b>                    |
| Electroporation         | No. of Electric Pulse (1st, 2nd) | Blastocyst /Treated Zygotes (%) <sup>a</sup> | Left lox66 /Blastocyst <sup>b</sup> (%) | Right lox71 /Blastocyst <sup>b</sup> (%) | 2 lox /Blastocyst <sup>b</sup> (%) | Flox /Blastocyst <sup>b</sup> (%) | Deletion /Blastocyst <sup>b</sup> (%) |
| Simultaneous            | ×3                               | <b>48/52 (92%)</b>                           | 7/46 (15%)                              | 7/46 (15%)                               | 2/46 (4%)                          | <b>2/46 (4%)</b>                  | <b>36/46 (78%)</b>                    |
|                         | ×5                               | <b>51/54 (94%)</b>                           | 8/48 (17%)                              | 6/48 (13%)                               | 2/48 (4%)                          | <b>1/48 (2%)</b>                  | <b>39/48 (81%)</b>                    |
|                         | ×7                               | <b>40/45 (89%)</b>                           | 8/40 (20%)                              | 6/40 (15%)                               | 3/40 (8%)                          | <b>3/40 (8%)</b>                  | <b>29/40 (73%)</b>                    |
| Sequential              | ×5, ×5                           | <b>40/81 (49%)</b>                           | 9/40 (23%)                              | 25/40 (63%)                              | 7/40 (18%)                         | <b>3/40 (8%)</b>                  | <b>12/40 (30%)</b>                    |
|                         | ×7, ×3                           | <b>35/77 (45%)</b>                           | 12/34 (35%)                             | 19/34 (56%)                              | 10/34 (29%)                        | <b>5/34 (15%)</b>                 | <b>13/34 (38%)</b>                    |
|                         | ×7, ×5                           | <b>36/77 (47%)</b>                           | 10/34 (29%)                             | 21/34 (62%)                              | 5/34 (15%)                         | <b>4/34 (12%)</b>                 | <b>11/34 (32%)</b>                    |
|                         | ×7, ×7                           | <b>193/354 (55%)</b>                         | 58/155 (37%)                            | 89/155 (57%)                             | 39/155 (25%)                       | <b>33/155 (21%)</b>               | <b>56/155 (36%)</b>                   |
|                         | ×9, ×9                           | <b>22/81 (27%)</b>                           | 8/22 (36%)                              | 12/22 (55%)                              | 6/22 (27%)                         | <b>5/22 (23%)</b>                 | <b>2/22 (9%)</b>                      |

N.D., not determined because of poor *in vitro* development

2 lox, lox66 and lox71 in same or different alleles

Flox, lox66 and lox71 in a same allele

<sup>a</sup>Embryo survival rates (blastocyst/treated zygote).

<sup>b</sup>Total blastocysts examined. Samples that were not amplified by PCR were excluded because they could have contained chromosomal deletions.

<sup>c</sup>We adopted 50/12/200 and 25/6/100 ng/μl of Cas9/gRNA/ssODN for sequential microinjection experiments because simultaneous microinjection of 100/24/400 ng/μl caused an extreme decrease in developmental rate *in vitro*, indicating that these concentrations were toxic for embryonic development.

**Table S2.** Generation of *Tet3* flox blastocyst embryos by electroporation.

| Electroporation Method | No. of Electric Pulse (1st, 2nd) | Blastocyst /Treated Zygotes (%) <sup>a</sup> | Left loxP /Blastocyst <sup>b</sup> (%) | Right loxP /Blastocyst <sup>b</sup> (%) | 2 lox /Blastocyst <sup>b</sup> (%) | Flox /Blastocyst <sup>b</sup> (%) | Deletion /Blastocyst <sup>b</sup> (%) |
|------------------------|----------------------------------|----------------------------------------------|----------------------------------------|-----------------------------------------|------------------------------------|-----------------------------------|---------------------------------------|
| Simultaneous           | ×7                               | <b>72/124 (58%)</b>                          | 7/39 (18%)                             | 11/39 (28%)                             | 3/39 (8%)                          | <b>3/39 (8%)</b>                  | <b>38/39 (97%)</b>                    |
| Sequential             | ×7, ×7                           | <b>39/100 (39%)</b>                          | 29/37 (78%)                            | 14/37 (38%)                             | 8/37 (22%)                         | <b>8/37 (22%)</b>                 | <b>24/37 (65%)</b>                    |

2 lox, loxPs in same or different alleles

Flox, loxPs in a same allele

<sup>a</sup>Embryo survival rates (blastocyst/treated zygote).

<sup>b</sup>Total blastocysts examined. Samples that were not amplified by PCR were excluded because they could have contained chromosomal deletions.

**Table S3.** Generation of *Mecp2* flox mice.

| Method                       |              | Born /Treated<br>Zygotes (%) | Born<br>/ET (%) | Left lox66<br>/Born <sup>a</sup> (%) | Right lox71<br>/Born <sup>a</sup> (%) | 2 lox<br>/Born <sup>a</sup> (%) | <b>Flox</b><br>/Born <sup>a</sup> (%) | <b>Deletion</b><br>/Born <sup>a</sup> (%) | Flox/ET<br>(%) |
|------------------------------|--------------|------------------------------|-----------------|--------------------------------------|---------------------------------------|---------------------------------|---------------------------------------|-------------------------------------------|----------------|
| Microinjection <sup>b</sup>  | Simultaneous | 24/293 (8%)                  | 24/192 (13%)    | 3/23 (13%)                           | 2/23 (9%)                             | 1/23 (4%)                       | <b>1/23 (4%)</b>                      | <b>10/23 (43%)</b>                        | 1/192 (0.5%)   |
|                              | Sequential   | 24/510 (5%)                  | 24/305 (8%)     | 7/23 (30%)                           | 9/23 (39%)                            | 3/23 (13%)                      | <b>3/23 (13%)</b>                     | <b>4/23 (17%)</b>                         | 3/305 (1.0%)   |
| Electroporation <sup>b</sup> | Simultaneous | 93/436 (21%)                 | 93/396 (23%)    | 14/86 (16%)                          | 14/86 (16%)                           | 6/86 (7%)                       | <b>4/86 (5%)</b>                      | <b>45/86 (52%)</b>                        | 4/396 (1.0%)   |
|                              | Sequential   | 94/817 (12%)                 | 94/450 (21%)    | 27/86 (31%)                          | 36/86 (42%)                           | 15/86 (17%)                     | <b>12/86 (14%)</b>                    | <b>12/86 (14%)</b>                        | 12/450 (2.7%)  |

ET, embryo transferred

2 lox, lox66 and lox71 in same or different alleles

Flox, lox66 and lox71 in a same allele

<sup>a</sup>Total newborn mice examined. Samples that were not amplified by PCR were excluded because they could have contained chromosomal deletions.

<sup>b</sup>According to the flox frequencies in *in vitro* experiments, microinjection was performed using 50/12/200 ng/μl of Cas9/gRNA/ssODN, and electroporation was performed using seven electric pulses. Genome-edited 2-cell embryos were transferred to oviducts of pseudopregnant mice, and genomic DNA from newborn mice was analyzed by PCR and RFLP assays (**Fig. S1b**).

**Table S4.** Generation of *Tet3* flox mice by electroporation.

| Electroporation<br>method |  | Born /Treated<br>Zygotes (%) | Born<br>/ET (%) | Left loxP<br>/Born <sup>a</sup> (%) | Right loxP<br>/Born <sup>a</sup> (%) | 2 lox<br>/Born <sup>a</sup> (%) | <b>Flox</b><br>/Born <sup>a</sup> (%) | <b>Deletion</b><br>/Born <sup>a</sup> (%) | Flox/ET<br>(%) |
|---------------------------|--|------------------------------|-----------------|-------------------------------------|--------------------------------------|---------------------------------|---------------------------------------|-------------------------------------------|----------------|
| Simultaneous              |  | 44/222 (20%)                 | 44/215 (20%)    | 11/44 (25%)                         | 6/44 (14%)                           | 3/44 (7%)                       | <b>3/44 (7%)</b>                      | <b>38/44 (86%)</b>                        | 3/215 (1.4%)   |
| Sequential                |  | 8/130 (6%)                   | 8/80 (10%)      | 4/8 (50%)                           | 6/8 (75%)                            | 4/8 (50%)                       | <b>4/8 (50%)</b>                      | <b>1/8 (13%)</b>                          | 4/80 (5.0%)    |

ET, embryo transferred

2 lox, two loxPs in same or different alleles

Flox, two loxPs in a same allele

<sup>a</sup>Total newborn mice examined.

**Table S5.** Direct production of Cre/lox mice by sequential electroporation.

| Locus        | Cre Tg            | Born /Treated<br>Zygotes (%) | Born<br>/ET (%) | Cre Tg<br>/Born (%) | Left lox<br>/Cre Tg <sup>a</sup> (%) | Right lox<br>/Cre Tg <sup>a</sup> (%) | 2 lox<br>/Cre Tg <sup>a</sup> (%) | <b>Flox</b><br>/Cre Tg <sup>a</sup> (%) | Deletion<br>/Cre Tg <sup>a</sup> (%) | Cre-flox/ET<br>(%) |
|--------------|-------------------|------------------------------|-----------------|---------------------|--------------------------------------|---------------------------------------|-----------------------------------|-----------------------------------------|--------------------------------------|--------------------|
| <i>Mecp2</i> | <i>Adipoq-Cre</i> | 15/183 (8%)                  | 15/70 (21%)     | 6/15 (40%)          | 3/5 (60%)                            | 1/5 (20%)                             | 1/5 (20%)                         | <b>1/5 (20%)</b>                        | 0/5 (0%)                             | 1/70 (1.4%)        |
| <i>Tet3</i>  | <i>Pdx-Cre</i>    | 9/65 (14%)                   | 9/54 (17%)      | 5/9 (56%)           | 3/4 (75%)                            | 2/4 (50%)                             | 2/4 (50%)                         | <b>1/4 (25%)</b>                        | 2/4 (50%)                            | 1/54 (1.9%)        |

ET, embryo transferred

Tg, transgenic

2 lox: two loxs in same or different alleles

Flox: two loxs in a same allele

<sup>a</sup>Total Cre Tg mice examined. Samples not amplified by PCR which may be indicative of chromosomal deletion were excluded.



**Table S6.** gRNA and oligonucleotides used in this study.

**Target sequences (20 mer target + PAM<sup>a</sup>)**

| Gene target (name of gRNA) | Sequence (5' to 3')     |
|----------------------------|-------------------------|
| Mecp2-Left (Mecp2-L2)      | CCCAAGGATACAGTATCCTAggg |
| Mecp2-Right (Mecp2-R1)     | AGGAGTGAGGTCTAGTACTTggg |
| Tet3-Left (Tet3Ex8-2)      | CTTCCCAGCAATGGTTCTGGtgg |
| Tet3-Right (Tet3Ex9-3)     | ATCTAAGCCAACACTACCTAggg |

<sup>a</sup>PAM in lower case

**Donor ssODNs used for HDR-mediated knock-in**

| Gene target (name of ssODN)  | Sequence (5' to 3')                                                                                                                                                       |
|------------------------------|---------------------------------------------------------------------------------------------------------------------------------------------------------------------------|
| Mecp2-Left (Mecp2-L2-lox66)  | ccagcaacctaaagctgtaagaaatctttgggccccagcttgacccaa<br>ggatacagtagtctagcTACCGTTCGTATAATGTATG<br>CTATACGAAGTTATcctaggggaagtacaaaatcagaga<br>tagtatgcagcagccagggtctcatgtgtggca |
| Mecp2-Right (Mecp2-R1-lox71) | ccactcctctgtactccctggctttccacaatcctaaactgaaggagtg<br>aggtctagtTACCGTTCGTATAGCATAACATTATA<br>CGAAGTTATgaattcactgggggtcattgggctagactgaata<br>tctttgggtgtaccagacctaaccacca   |
| Tet3-Left (Tet3Ex8_2loxPL)   | accaggggaacgctgagaccctggacgcacttggtctctgtcttccc<br>agcaatggttctgatccATAACTTCGTATAGCATAAC<br>ATTATACGAAGTTATggtggctcattctggcaggaagt<br>ttccggcttgagcagctctgaatgtacctaattg  |
| Tet3-Right (Tet3Ex9_3loxPR)  | actgatctgagggtatctctgtggaagggcaggagcaggccatctaa<br>gccaactaccATAACTTCGTATAATGTATGCTA<br>TACGAAGTTATgaattctagggtccaagaatccactctacttc<br>cctctcacaagtagcaaacaccattagttggc   |

Lox sequences in upper case

**Oligonucleotides used for PCR-RFLP analysis and PCR genotyping**

| Gene target                        | Name    | Sequence (5' to 3')       | Restriction enzyme   |
|------------------------------------|---------|---------------------------|----------------------|
| Mecp2<br>(left & right)            | Mecp2-F | AAGAAGCCAACCATACAGTGC     | <i>Nhe</i> I for L2  |
|                                    | Mecp2-R | GCTTGCTCAGAAGCCAAAAC      | <i>Eco</i> RI for R1 |
| Tet3Ex8-2<br>(left)                | Tet3-LF | TACGAAGTTATGGTGGGCTC      | <i>Bam</i> HI        |
|                                    | Tet3-LR | AGTTATGAATTCTAGGGCTT      |                      |
| Tet3Ex9-3<br>(right)               | Tet3-F  | GAACGCTGAGACCCTGGAC       | <i>Eco</i> RI        |
|                                    | Tet3-R  | ATTCACACGTTGGCTCTGGT      |                      |
| Cre<br>(transgene)                 | IMR1084 | GCGGTCTGGCAGTAAAACTATC    | -                    |
|                                    | IMR1085 | GTGAAACAGCATTGCTGTCACTT   |                      |
| Cre (internal<br>positive control) | IMR7338 | CTAGGCCACAGAATTGAAAGATCT  | -                    |
|                                    | IMR7339 | GTAGGTGGAAATTCTAGCATCATCC |                      |

**Table S7.** Oligonucleotides used for off-target analysis used in this study.

***Mecp2***

| Gene target        | Direction | Sequence (5' to 3')       |
|--------------------|-----------|---------------------------|
| Mecp2-Left<br>OT-1 | -F        | CATCTTCCAGCTGCTTGTC       |
|                    | -R        | CCATCAAGACGCACATGTTT      |
| Mecp2-Left<br>OT-2 | -F        | ATTTCAAGAGGGGGATGGAC      |
|                    | -R        | AAGCAAACCAAGCAGTCTATTG    |
| Mecp2-Left<br>OT-3 | -F        | TGAGGATTCTTCAGACCCATT     |
|                    | -R        | GTCTCTGGGGGTGAGAGATG      |
| Mecp2-Left<br>OT-4 | -F        | TGGATAGACAGAAAAGTCAGACAGG |
|                    | -R        | TTTGTGCATGTCTTTTGTGTTCC   |
| Mecp2-Left<br>OT-5 | -F        | GCAGGGACAATTGGGTTGTA      |
|                    | -R        | GGAAAGCACTTAAAGGTTATCATCA |
| Mecp2-Left<br>OT-6 | -F        | CCGTTTTGTCAGGTTTCTCTG     |
|                    | -R        | AACCCATTCACTCAGTGACAAA    |
| Mecp2-Left<br>OT-7 | -F        | TGTGTTGGCTCTTATGGCTGT     |
|                    | -R        | TTGTCATCGCTTCATGGGTA      |
| Mecp2-Left<br>OT-8 | -F        | CAGACTCAAAATCGCTTTGC      |
|                    | -R        | CCTGCTGGGTAGTTTTACAGAGA   |

| Gene target         | Direction | Sequence (5' to 3')        |
|---------------------|-----------|----------------------------|
| Mecp2-Right<br>OT-1 | -F        | GCTAATTAATTCTTTTCAGGATGTTT |
|                     | -R        | TGGAAGCCTTAGCAGGATGT       |
| Mecp2-Right<br>OT-2 | -F        | AGACCACTCCCCAAAGTGTG       |
|                     | -R        | GGCTCCCTCCCTCTCAGTAG       |
| Mecp2-Right<br>OT-3 | -F        | CAGCGAGGTCTGTCTACTGA       |
|                     | -R        | GTGTAATTGTCTTTCTTGTGCT     |
| Mecp2-Right<br>OT-4 | -F        | GGCCTCAACTCCCATTGATA       |
|                     | -R        | GTGGGAAAGCTGACAGAAGG       |
| Mecp2-Right<br>OT-5 | -F        | TTGTTTTTACAAGCAGGAACAAG    |
|                     | -R        | AAGCAAGGTGTTCTTGTGATT      |

|             |    |                      |
|-------------|----|----------------------|
| Mecp2-Left  | -F | TCACCAGCAACCTAAAGCTG |
| On-Target   | -R | TTGTAGTGGCTCATGCTTGC |
| Mecp2-Right | -F | GGGTAGGAAGGCTAGGATGG |
| On-Target   | -R | GCTTGCTCAGAAGCCAAAAC |

***Tet3***

| Gene target        | Direction | Sequence (5' to 3')       |
|--------------------|-----------|---------------------------|
| Tet3-Left<br>OT-1  | -F        | GGCATAATGAGAATTGCATGAG    |
|                    | -R        | AAAGGGAAGGGAACCATTTG      |
| Tet3-Left<br>OT-2  | -F        | CCCTGCTTCTAGATGTGGT       |
|                    | -R        | TGTCCTTCTTACCCAGAAACA     |
| Tet3-Left<br>OT-3  | -F        | CTCACACAGCACAGAGGAGAA     |
|                    | -R        | TTTGTGTACCTGAAAGTGTGGA    |
| Tet3-Left<br>OT-4  | -F        | AGTTCTCCAGCCTTCTCTGT      |
|                    | -R        | ATGAGGTTGGCTTGGCACT       |
| Tet3-Left<br>OT-5  | -F        | GTCCCCTGAGAAGCATGAAA      |
|                    | -R        | TAAGGTTCCCTCCACCGGTT      |
| Tet3-Left<br>OT-6  | -F        | CCCGGTTGCTGATTCAAG        |
|                    | -R        | TGTGTGAAGTTTCAATTTACCAATC |
| Tet3-Left<br>OT-7  | -F        | GGTCAGAGATCGGGTCTTA       |
|                    | -R        | TGGTGTATAAAGGGAGTATTGCAT  |
| Tet3-Left<br>OT-8  | -F        | CACCTGCCTCTGATGCTACT      |
|                    | -R        | CAGCATCCTGTGTTTTCTCA      |
| Tet3-Left<br>OT-9  | -F        | GAATGTGCCAGTCTGATCCA      |
|                    | -R        | GTCTGCTGGCAACTCTGTCA      |
| Tet3-Left<br>OT-10 | -F        | TCCCTGGGGTTTCTTTCTTT      |
|                    | -R        | CATCATGGCCAACAAAGTCA      |

| Gene target        | Direction | Sequence (5' to 3')        |
|--------------------|-----------|----------------------------|
| Tet3-Right<br>OT-1 | -F        | AGAAACAAGGCCAGGTAGCA       |
|                    | -R        | TTGTGCCAGGTAGTGTGACG       |
| Tet3-Right<br>OT-2 | -F        | TTGCTAAATTGGCCAAAAGG       |
|                    | -R        | GTGTGCTTGTCTTTAAAAATTGG    |
| Tet3-Right<br>OT-3 | -F        | TTGGCAGAGTGGAAGTAGGAA      |
|                    | -R        | ATCTGCTTTTCTGCCTGCTG       |
| Tet3-Right<br>OT-4 | -F        | CCCATCTAAGGACTGCCCTA       |
|                    | -R        | ACAGCCCATATCCACTGTGA       |
| Tet3-Right<br>OT-5 | -F        | TCAGAGAGTGGCTGTGTGGT       |
|                    | -R        | TTCTGCTTTCACATGGGTTG       |
| Tet3-Right<br>OT-6 | -F        | ATCCAGTAGGCATCGCTGAG       |
|                    | -R        | AAAAGTGAAGCCTGGGGTTT       |
| Tet3-Right<br>OT-7 | -F        | GGTTGGCCATTACTCCACAC       |
|                    | -R        | TCAACACCAGTTTGGGTGAG       |
| Tet3-Right<br>OT-8 | -F        | AGGACCCTGGAAATGCAAC        |
|                    | -R        | CAGTGTATAAACCAGTACTTCATGTC |
| Tet3-Right<br>OT-9 | -F        | CACCTTACTAGCGGCACTT        |
|                    | -R        | CCTGTTTTTCTGTATCCTTTG      |

|            |    |                      |
|------------|----|----------------------|
| Tet3-Left  | -F | TACGAAGTTATGGTGGGCTC |
| On-Target  | -R | AGTTATGAATTCTAGGGCTT |
| Tet3-Right | -F | CACACAGGTGACCAATGAGG |
| On-Target  | -R | ATTCACACGTTGGCTCTGGT |
